# Supplementary material
Source: PubMed Central journal article supplement (PMC4615696)

**Figure S1. Distributions of urine KIM-1, NGAL, and  $\alpha$ 1m in HIV-infected African-American women, stratified by number of APOL1 risk alleles.**

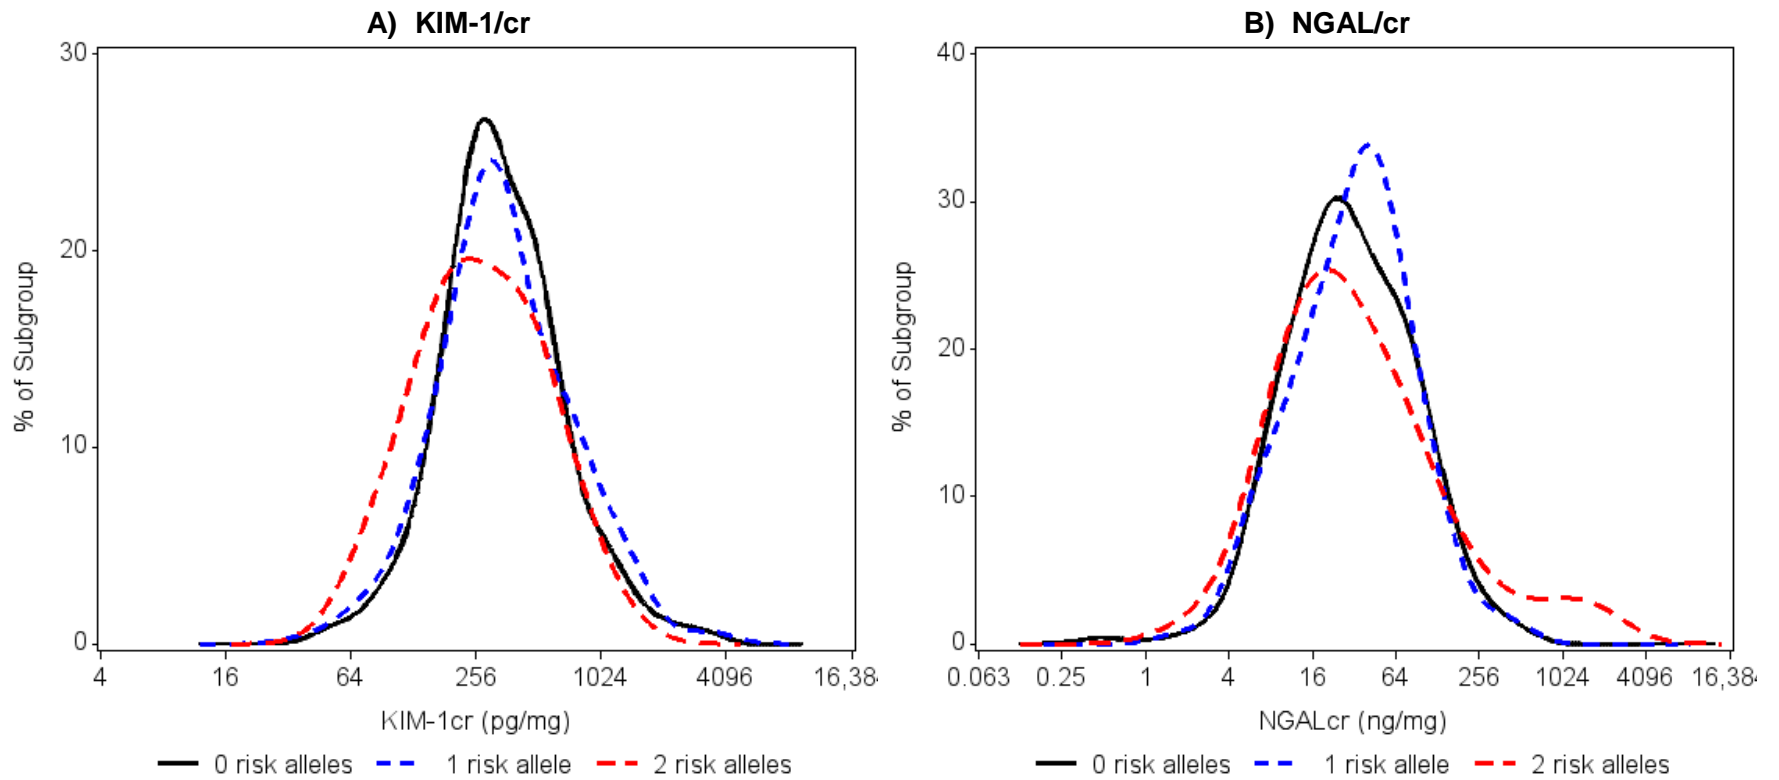

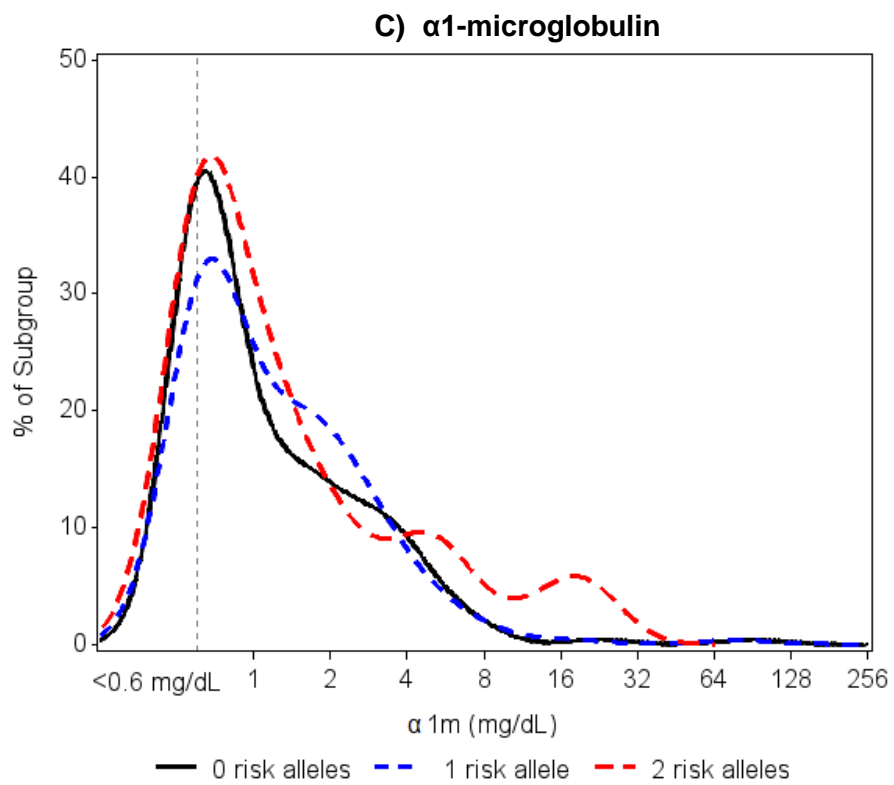

Supplement: NIHMS729060-supplement-1.pdf [file NIHMS729060-supplement-1.pdf]
