# Supplementary material
Source: PubMed Central journal article supplement (PMC4615696)
Supplement: NIHMS729060-supplement-2.pdf [file NIHMS729060-supplement-2.pdf]

## **Item S1. Supplemental Methods**

*Urine biomarker measurement.* Coefficients of variation (CV) for the urine biomarker measurements were: albumin, 5.9%; creatinine, 4.1%; IL-18, 7.2%; KIM-1, 5.2%; NGAL, 5.4%; and  $\alpha$ 1m, 5.2%. All urine specimens were in continuous storage at -80°C until biomarker measurement without prior freeze-thaw; mean urine storage time was 11 years.

*Serum cystatin C measurement.* Assays were run concurrently from all three clinic visits, to minimize concern for drift in the assay over time. Intra-assay CVs were <2% at serum concentrations of 0.7 and 1.1 mg/L. Inter-assay CVs were 4.4% and 3.9% at serum concentrations of 0.8 and 2.2 mg/L, respectively. Estimated GFR was capped at 120 ml/min/1.73m<sup>2</sup>.
