# Supplementary material
Source: PubMed Central journal article supplement (PMC4615696)
Supplement: NIHMS729060-supplement-3.pdf [file NIHMS729060-supplement-3.pdf]

**Table S1. Demographic and clinical characteristics of HIV-infected African-American women in WIHS, stratified by inclusion/exclusion status for APOL1 substudy**

| <b>Characteristic</b>                                     | <b>Included<br/>(N = 431)</b> | <b>Excluded<br/>(N = 364)</b> | <b>P-value</b> |
|-----------------------------------------------------------|-------------------------------|-------------------------------|----------------|
| <b>Baseline Age (y)</b>                                   | 41 (36-46)                    | 42 (36-47)                    | 0.55           |
| <b>Hypertension</b>                                       | 31%                           | 34%                           | 0.37           |
| <b>Diabetes mellitus</b>                                  | 10%                           | 19%                           | 0.0006         |
| <b>Hepatitis C virus infection</b>                        | 35%                           | 37%                           | 0.56           |
| <b>Current CD4+ cell count<br/>(cells/mm<sup>3</sup>)</b> | 391 (246-583)                 | 330 (179-539)                 | 0.0011         |
| <b>History of AIDS</b>                                    | 48%                           | 48%                           | 0.93           |
| <b>HIV RNA (copies/mL)</b>                                |                               |                               |                |
| <b>&lt;=80</b>                                            | 28%                           | 20%                           | 0.087          |
| <b>81-1999</b>                                            | 23%                           | 27%                           |                |
| <b>2000-9999</b>                                          | 16%                           | 17%                           |                |
| <b>&gt;=10000</b>                                         | 32%                           | 36%                           |                |
| <b>Current HAART use</b>                                  | 59%                           | 32%                           | <.0001         |

Data are presented as median (interquartile range) or numbers (percent). P-values from chi-square and Kruskal-Wallis tests for categorical and continuous variables, respectively.

Abbreviations: HAART, highly active antiretroviral therapy.
