# Supplementary material
Source: PubMed Central journal article supplement (PMC4615696)
Supplement: NIHMS729060-supplement-4.pdf [file NIHMS729060-supplement-4.pdf]

**Table S2. Proportion of missing data for variables included in multiple imputation model**

| <b>Variable</b>       | <b>Proportion of missing data</b> |
|-----------------------|-----------------------------------|
| Age                   | <1%                               |
| Hypertension          | <1%                               |
| Diabetes              | <1%                               |
| BMI                   | <1%                               |
| Current CD4 Count     | <1%                               |
| Nadir CD4 Count       | <1%                               |
| History of AIDS       | <1%                               |
| HIV RNA               | <1%                               |
| Hepatitis C           | 25%                               |
| Current HAART use     | <1%                               |
| Serum Cystatin C      | 48%                               |
| Urine Albumin         | 52%                               |
| Urine Creatinine      | 52%                               |
| Urine IL-18           | 52%                               |
| Urine KIM-1           | 52%                               |
| Urine NGAL            | 52%                               |
| Urine $\alpha$ 1m     | 54%                               |
| ApoL1 Genotype        | 28%                               |
| Principal Component 1 | 31%                               |
| Principal Component 3 | 31%                               |
| Principal Component 5 | 31%                               |

*Abbreviations:*  $\alpha$ 1m,  $\alpha$ 1-microglobulin; BMI, body mass index; HAART, highly active antiretroviral therapy; IL-18, interleukin-18; KIM-1, kidney injury molecule-1; NGAL, neutrophil gelatinase-associated lipocalin
