# Supplementary material
Source: PubMed Central journal article supplement (PMC4615696)
Supplement: NIHMS729060-supplement-5.pdf [file NIHMS729060-supplement-5.pdf]

**Table S3. Adjusted associations<sup>1</sup> of APOL1 risk alleles with biomarkers among HIV-infected African-American women (N=795) using multiple imputation to include participants with missing APOL1 genotype or urine biomarker measurements**

|                             |                                                  | Models of inheritance  |                       |                       |
|-----------------------------|--------------------------------------------------|------------------------|-----------------------|-----------------------|
|                             |                                                  | Recessive <sup>2</sup> | Dominant <sup>3</sup> | Additive <sup>4</sup> |
|                             | <b>% Estimate<sup>5</sup><br/>(95% CI)</b>       | <b>P-value</b>         | <b>P-value</b>        | <b>P-value</b>        |
| <b>Continuous outcomes</b>  |                                                  |                        |                       |                       |
|                             | ACR (mg/g)                                       | 0.0087                 | 0.69                  | 0.23                  |
|                             | IL-18/Cr (pg/mg)                                 | 0.92                   | 0.78                  | 0.31                  |
|                             | KIM-1/Cr (pg/mg)                                 | 0.17                   | 0.77                  | 0.098                 |
|                             | NGAL/Cr (ng/mg)                                  | 0.58                   | 0.54                  | 0.25                  |
|                             | <b>Prevalence Ratio<sup>6</sup><br/>(95% CI)</b> | <b>P-value</b>         | <b>P-value</b>        | <b>P-value</b>        |
| <b>Dichotomous outcomes</b> |                                                  |                        |                       |                       |
|                             | ACR >30mg/g                                      | 0.011                  | 0.82                  | 0.16                  |
|                             | Detectable $\alpha$ 1m                           | 0.85                   | 0.68                  | 0.53                  |

<sup>1</sup>Multivariable models adjust for age, hypertension, diabetes mellitus, body mass index, HCV infection, HIV viral load, CD4 cell count, current HAART, eGFR, PC1, PC3, and PC5.

<sup>2</sup>P-value compares 2 vs 0/1 APOL1 risk alleles

<sup>3</sup>P-value compares 2/1 vs 0 APOL1 risk alleles

<sup>4</sup>P-value for trend, 2 vs 1 vs 0 APOL1 risk alleles

<sup>5</sup>Estimated percentage difference attributable to having 2 vs 0/1 APOL1 risk alleles.

<sup>6</sup>Adjusted prevalence ratio among individuals with 2 vs 0/1 APOL1 risk alleles.

*Abbreviations:* ACR, albumin-creatinine ratio;  $\alpha$ 1m,  $\alpha$ 1-microglobulin; CI, confidence interval; Cr, creatinine; IL-18, interleukin-18; KIM-1, kidney injury molecule-1; NGAL, neutrophil gelatinase-associated lipocalin; PC, principal component.
