# Supplementary material
Source: PubMed Central journal article supplement (PMC4615696)
Supplement: NIHMS729060-supplement-6.pdf [file NIHMS729060-supplement-6.pdf]

**Table S4. Associations of APOL1 risk alleles with kidney function outcomes in HIV-infected African-American women (N=795), using multiple imputation to include participants with missing APOL1 genotype or urine biomarker measurements**

| Outcome                                                      | 0 risk alleles | 1 risk allele | 2 risk alleles    |
|--------------------------------------------------------------|----------------|---------------|-------------------|
| <b>Baseline eGFR, ml/min</b>                                 |                |               |                   |
| Estimated difference, 2 vs 0/1 alleles (95% CI) <sup>1</sup> |                |               |                   |
| Unadjusted                                                   | Ref            | Ref           | -4.7 (-12.1, 2.7) |
| Adjusted + ACR                                               | ---            | ---           | -3.9 (-9.6, 1.8)  |
| Adjusted + ACR, IL-18, KIM-1, NGAL, $\alpha$ 1m              | ---            | ---           | -3.5 (-8.9, 1.9)  |
| <b>Annual change in eGFR, ml/min</b>                         |                |               |                   |
| Estimated difference, 2 vs 0/1 alleles (95% CI) <sup>2</sup> |                |               |                   |
| Unadjusted                                                   | Ref            | Ref           | -1.3 (-2.3, -0.2) |
| Adjusted + ACR                                               | ---            | ---           | -1.1 (-2.1, -0.1) |
| Adjusted + ACR, IL-18, KIM-1, NGAL, $\alpha$ 1m              | ---            | ---           | -1.0 (-2.1, -0.0) |
| <b>Incident CKD</b>                                          |                |               |                   |
| Incident Rate Ratio, 2 vs 0/1 alleles (95% CI) <sup>3</sup>  |                |               |                   |
| Unadjusted                                                   | Ref            | Ref           | 1.71 (1.13, 2.61) |
| Adjusted + ACR                                               | ---            | ---           | 1.86 (1.23, 2.82) |
| Adjusted + ACR, IL-18, KIM-1, NGAL, $\alpha$ 1m              | ---            | ---           | 1.79 (1.22, 2.63) |
| <b>10% Rapid decline</b>                                     |                |               |                   |
| Incident Rate Ratio, 2 vs 0/1 alleles (95% CI) <sup>3</sup>  |                |               |                   |
| Unadjusted                                                   | Ref            | Ref           | 3.15 (1.66, 6.00) |
| Adjusted + ACR                                               | ---            | ---           | 2.65 (1.30, 5.39) |
| Adjusted + ACR, IL-18, KIM-1, NGAL, $\alpha$ 1m              | ---            | ---           | 2.46 (1.15, 5.23) |

Adjusted models control for age, hypertension, diabetes mellitus, hepatitis C virus infection, HIV viral load, CD4 lymphocyte count, HAART use, and kidney injury markers listed. *Abbreviations:* CI, confidence interval; CKD, chronic kidney disease; eGFR, estimated glomerular filtration rate; Ref, reference.

<sup>1</sup>Estimated difference in baseline eGFR attributable to having 2 vs 0/1 APOL1 risk alleles

<sup>2</sup>Estimated difference in annual eGFR change attributable to having 2 vs 0/1 APOL1 risk alleles

<sup>3</sup>Incident rate ratio for 2 vs 0/1 APOL1 risk alleles
