# Supplementary material
Source: PubMed Central journal article supplement (PMC4615696)
Supplement: NIHMS729060-supplement-7.pdf [file NIHMS729060-supplement-7.pdf]

**Table S5. Urine biomarker levels in HIV-infected African-American women with eGFR>60ml/min/1.73m<sup>2</sup>, stratified by number of APOL1 risk alleles**

|                                | 0 risk alleles<br>(N = 183) | 1 risk allele<br>(N = 183) | 2 risk alleles<br>(N = 42) | P-value                |                       |                       |
|--------------------------------|-----------------------------|----------------------------|----------------------------|------------------------|-----------------------|-----------------------|
|                                |                             |                            |                            | Recessive <sup>1</sup> | Dominant <sup>2</sup> | Additive <sup>3</sup> |
| <b>Glomerular Injury</b>       |                             |                            |                            |                        |                       |                       |
| <i>Creatinine-standardized</i> |                             |                            |                            |                        |                       |                       |
| ACR (mg/g)                     | 10 (6-26)                   | 11 (7-22)                  | 16 (7-43)                  | 0.027                  | 0.18                  | 0.047                 |
| ACR >30 mg/g                   | 39 (21%)                    | 34 (19%)                   | 17 (40%)                   | 0.0095                 | 0.22                  | 0.026                 |
| <i>Unstandardized</i>          |                             |                            |                            |                        |                       |                       |
| Urine Albumin (mg/mL)          | 0.16 (0.08-0.34)            | 0.16 (0.09-0.34)           | 0.35 (0.11-1.00)           | 0.0066                 | 0.057                 | 0.010                 |
| <b>Tubular Injury</b>          |                             |                            |                            |                        |                       |                       |
| <i>Creatinine-standardized</i> |                             |                            |                            |                        |                       |                       |
| IL-18/Cr (pg/mg)               | 95 (54-149)                 | 87 (56-147)                | 76 (57-144)                | 0.26                   | 0.31                  | 0.24                  |
| KIM-1/Cr (pg/mg)               | 318 (222-488)               | 322 (216-557)              | 283 (171-465)              | 0.047                  | 0.14                  | 0.057                 |
| NGAL/Cr (ng/mg)                | 28 (15-67)                  | 32 (15-56)                 | 25 (10-58)                 | 0.27                   | 0.59                  | 0.34                  |
| <i>Unstandardized</i>          |                             |                            |                            |                        |                       |                       |
| IL-18 (pg/mL)                  | 121 (65-247)                | 128 (69-240)               | 127 (83-215)               | 0.82                   | 0.80                  | 0.80                  |
| KIM-1 (pg/mL)                  | 450 (238-825)               | 510 (299-854)              | 438 (254-846)              | 0.76                   | 0.99                  | 0.85                  |
| NGAL (ng/mL)                   | 39 (18-86)                  | 42 (21-87)                 | 37 (21-81)                 | 0.92                   | 0.71                  | 0.92                  |
| <b>Tubular Dysfunction</b>     |                             |                            |                            |                        |                       |                       |
| Detectable α1m                 | 109 (61%)                   | 123 (68%)                  | 25 (60%)                   | 0.62                   | 0.82                  | 0.83                  |
| Urine Creatinine (mg/mL)       | 1.50 (0.91-2.09)            | 1.54 (0.94-2.08)           | 1.59 (1.09-2.50)           | 0.22                   | 0.20                  | 0.18                  |

Data are presented as median (interquartile range) or numbers (percent).

<sup>1</sup>P-value for 2 risk alleles vs 0/1 risk alleles, adjusted for age and ACR.

<sup>2</sup>P-value for 2/1 risk alleles vs 0 risk alleles, adjusted for age and ACR.

<sup>3</sup>P-value for trend (2 vs 1 vs 0 risk alleles), adjusted for age and ACR.

*Abbreviations:* ACR, albumin-creatinine ratio; α1m, α1-microglobulin; Cr, creatinine; IL-18, interleukin-18; KIM-1, kidney injury molecule-1; NGAL, neutrophil gelatinase-associated lipocalin.
